# Supplementary material for: Formulating Electron Beam‐Induced Covalent Linkages for Stable and High‐Energy‐Density Silicon Microparticle Anode
Source: PubMed Central journal article supplement (PMC10966573; doi:10.1002/advs.202305298), 2024-01-17
Supplement: ADVS-11-2305298-s001.pdf [file ADVS-11-2305298-s001.pdf]

## Supporting Information

for *Adv. Sci.*, DOI 10.1002/adv.202305298

Formulating Electron Beam-Induced Covalent Linkages for Stable and High-Energy-Density Silicon Microparticle Anode

*Minjun Je, Hye Bin Son, Yu-Jin Han, Hangeol Jang, Sungho Kim, Dongjoo kim, Jieun Kang, Jin-Hyeok Jeong, Chihyun Hwang, Gyujin Song, Hyun-Kon Song, Tae Sung Ha and Soojin Park\**

Supporting Information

**Formulating Electron Beam-Induced Covalent Linkages for Stable and High-Energy-Density Silicon Microparticle Anode**

*Minjun Je, Hye Bin Son, Yu-Jin Han, Hangeol Jang, Sungho Kim, Dongjoo kim, Jieun Kang, Jin-Hyeok Jeong, Chihyun Hwang, Gyujin Song, Hyun-Kon Song, Tae Sung Ha, Soojin Park\**

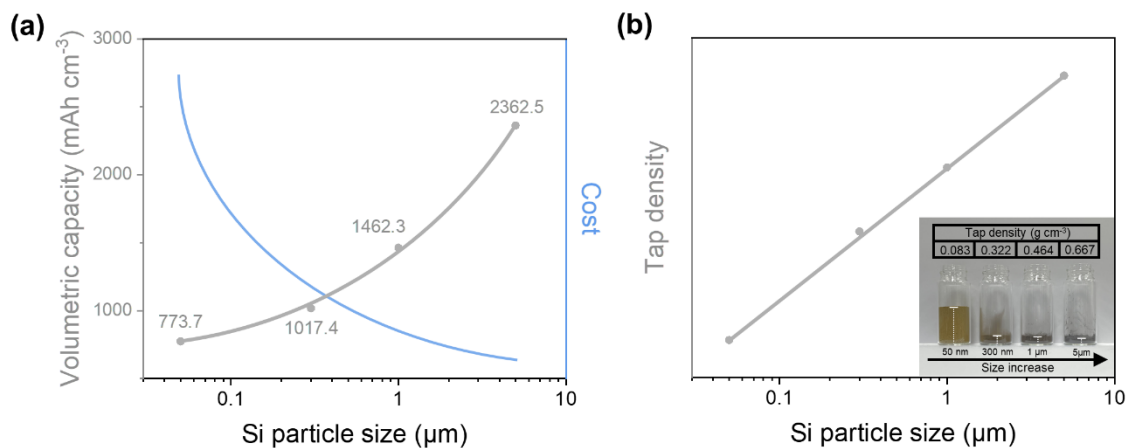

**Figure S1.** Comparison of (a) volumetric capacity, cost,<sup>[1]</sup> and (b) tap density of commercial silicon particles depending on their feature size.

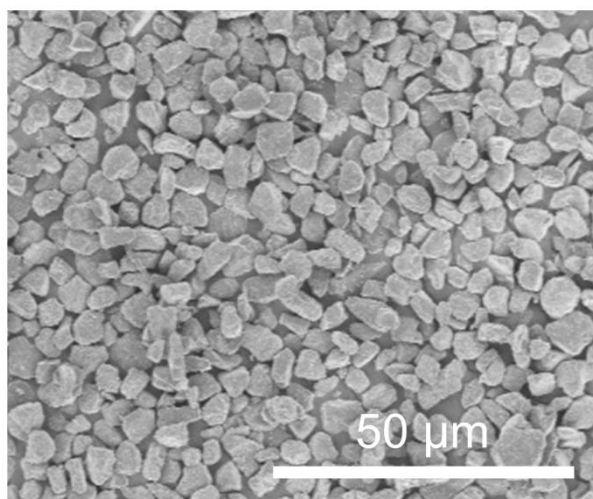

**Figure S2.** SEM image of bare Si.

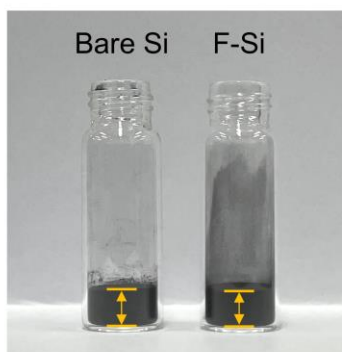

|                                      | Bare Si | F-Si |
|--------------------------------------|---------|------|
| Tap density<br>(g cm <sup>-3</sup> ) | 0.65    | 0.68 |

**Figure S3.** Tap densities of commercial SiMP (~5  $\mu\text{m}$ ) and F-Si powders.

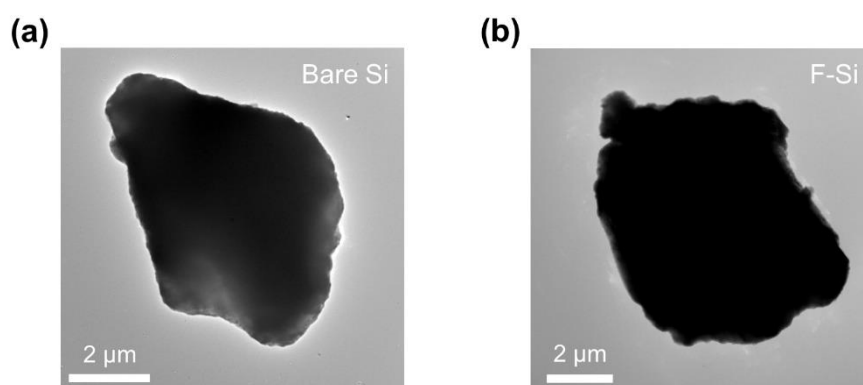

**Figure S4.** TEM images of (a) bare Si and (b) F-Si.

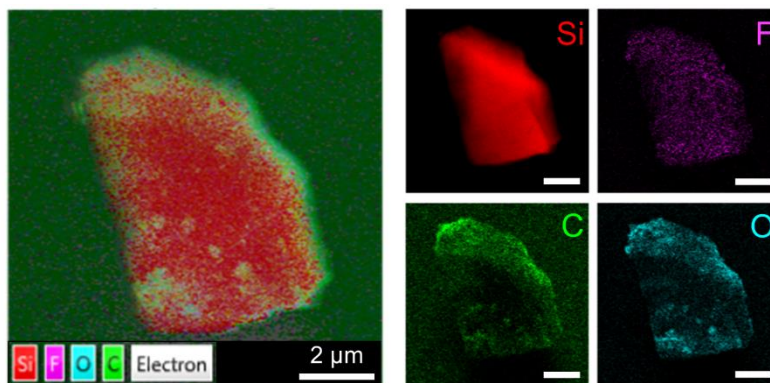

**Figure S5.** Energy dispersive spectroscopy elemental mapping results of F-Si powder through corrected high-resolution scanning transmission electron microscopy analysis (scale bar: 2 μm).

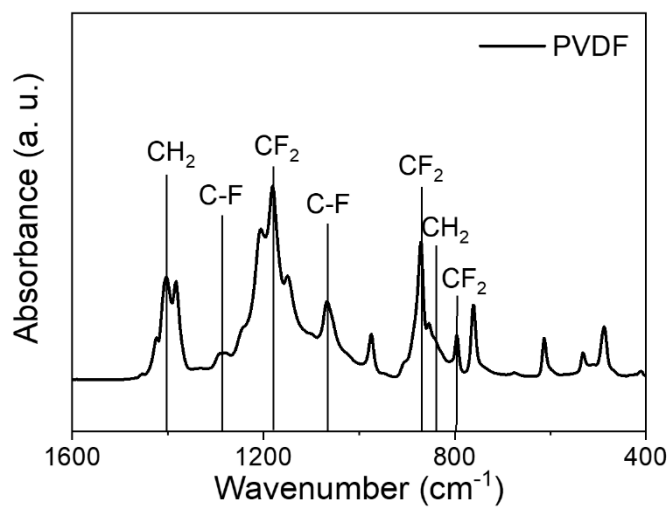

**Figure S6.** FT-IR analysis of PVDF.

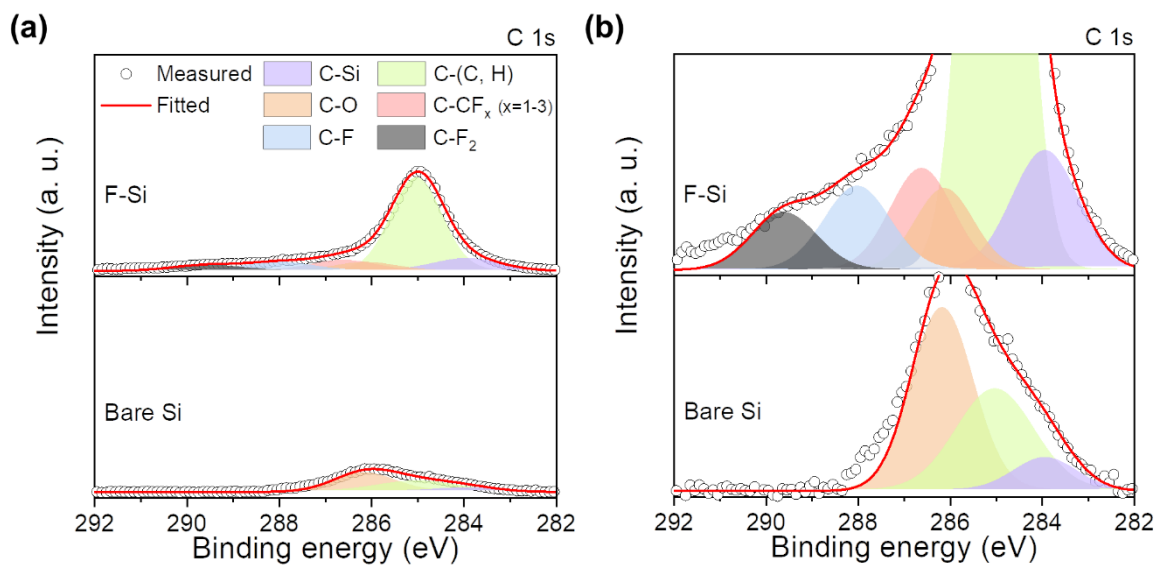

**Figure S7.** (a) Whole C 1s and (b) magnified C 1s XPS spectra of bare Si and F-Si powders.

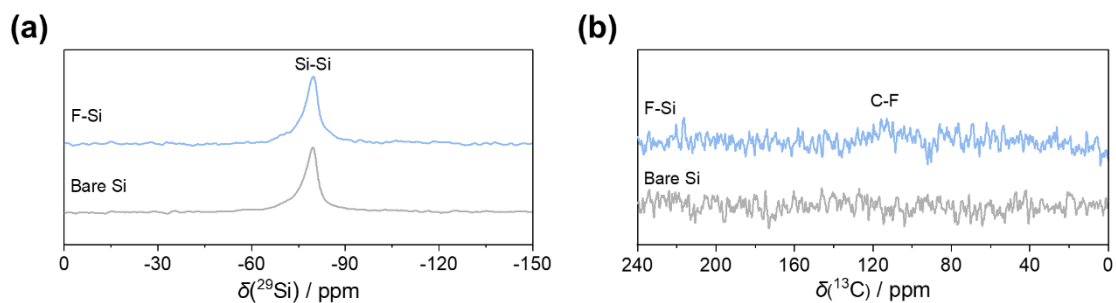

**Figure S8.** Solid (a) <sup>29</sup>Si and (b) <sup>13</sup>C NMR spectra of bare Si and F-Si powders.

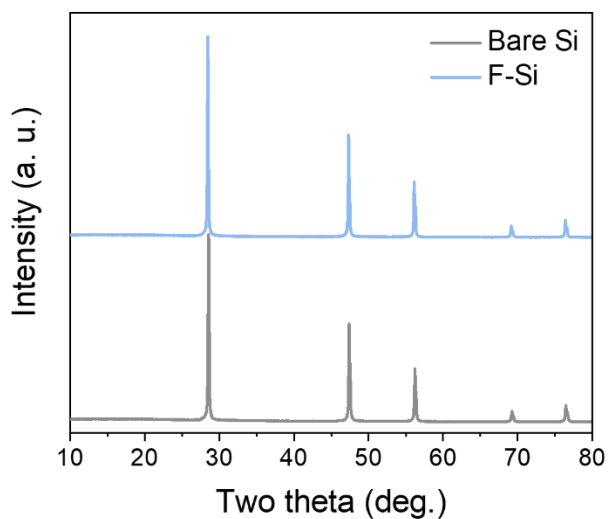

**Figure S9.** Comparative XRD patterns of bare Si and F-Si.

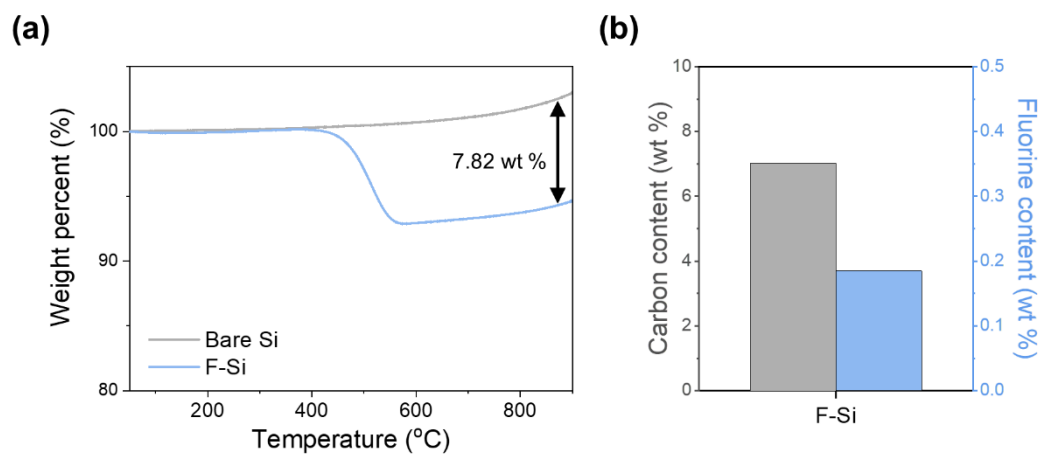

**Figure S10.** (a) TGA, (b) EA, and CIC analysis of F-Si for weight percent of the coating layer and C, F elements.

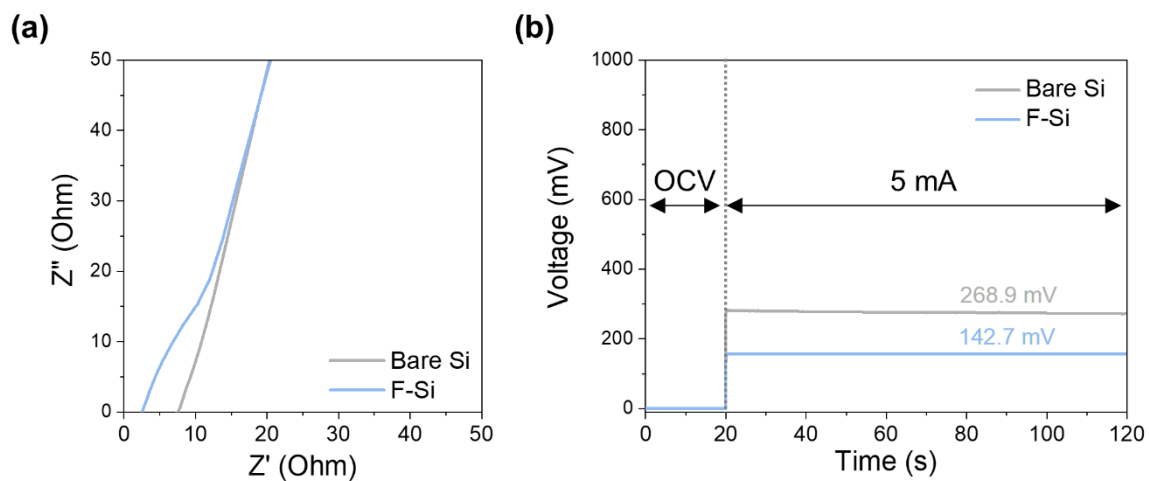

**Figure S11.** (a) Electrochemical impedance spectroscopy curves and (b) the voltage response to applied current of bare Si and F-Si electrodes.

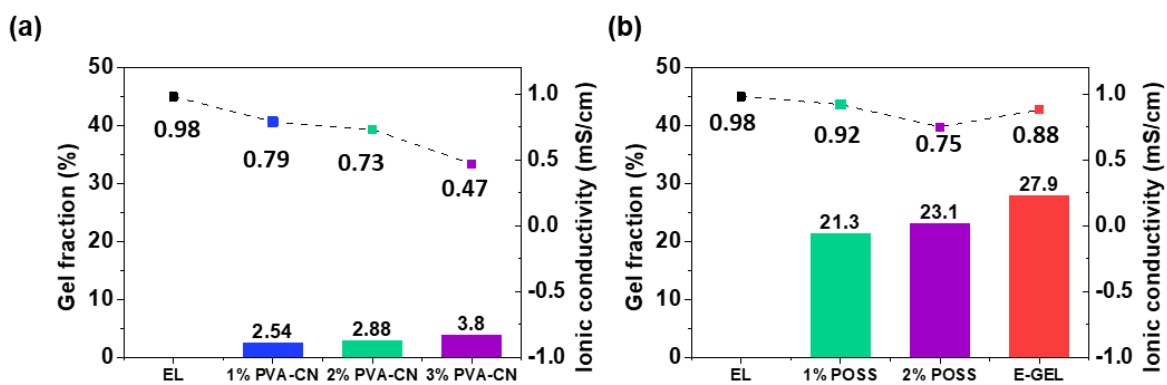

**Figure S12.** Gel fraction and ionic conductivity of gel polymer electrolytes with various amounts (a) PVA-CN and (b) POSS.



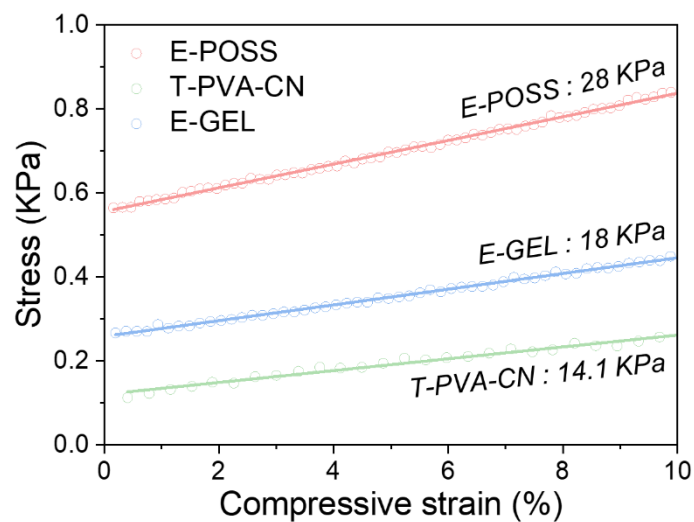

**Figure S13.** Calculated Young's modulus values in compressive strain-stress curves of E-POSS, T-PVA-CN, and E-GEL.

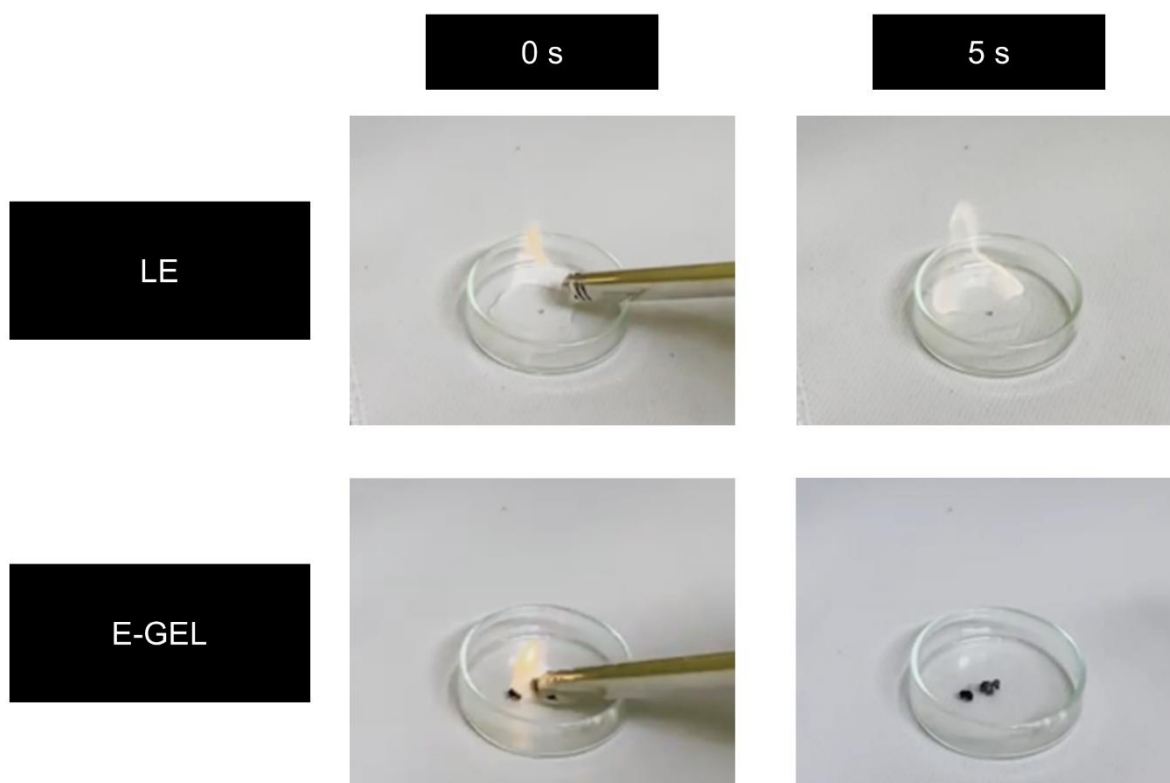

**Figure S14.** The combustion test of liquid electrolyte and E-GEL.

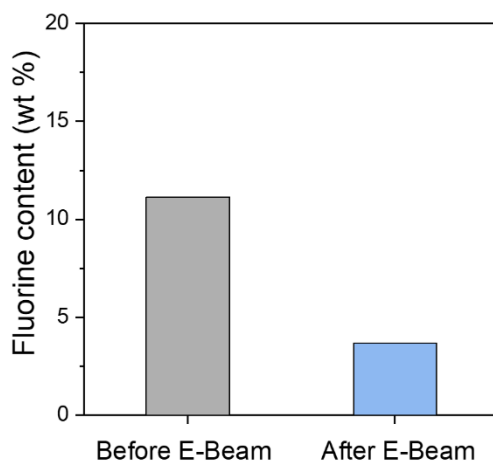

**Figure S15.** CIC results of F-Si particles obtained from F-Si|E-GEL precursor before/after electron beam irradiation.

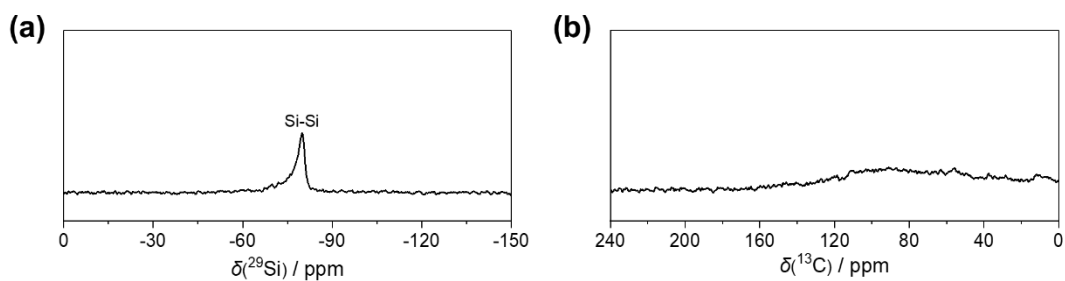

**Figure S16.** Solid (a)  $^{29}\text{Si}$  and (b)  $^{13}\text{C}$  NMR spectra of conventional carbon-coated Si particle after reaction with E-GEL.

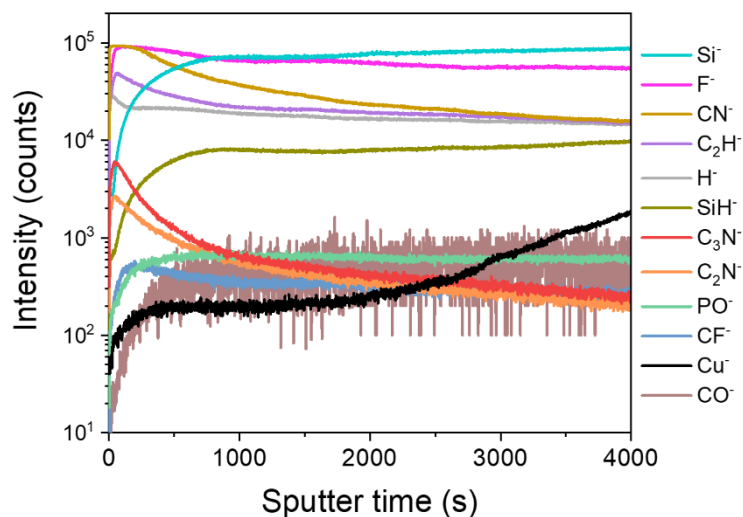

**Figure S17.** TOF-SIMS depth profiling result of F-Si electrode obtained from F-Si|E-GEL cell after electron beam exposure.

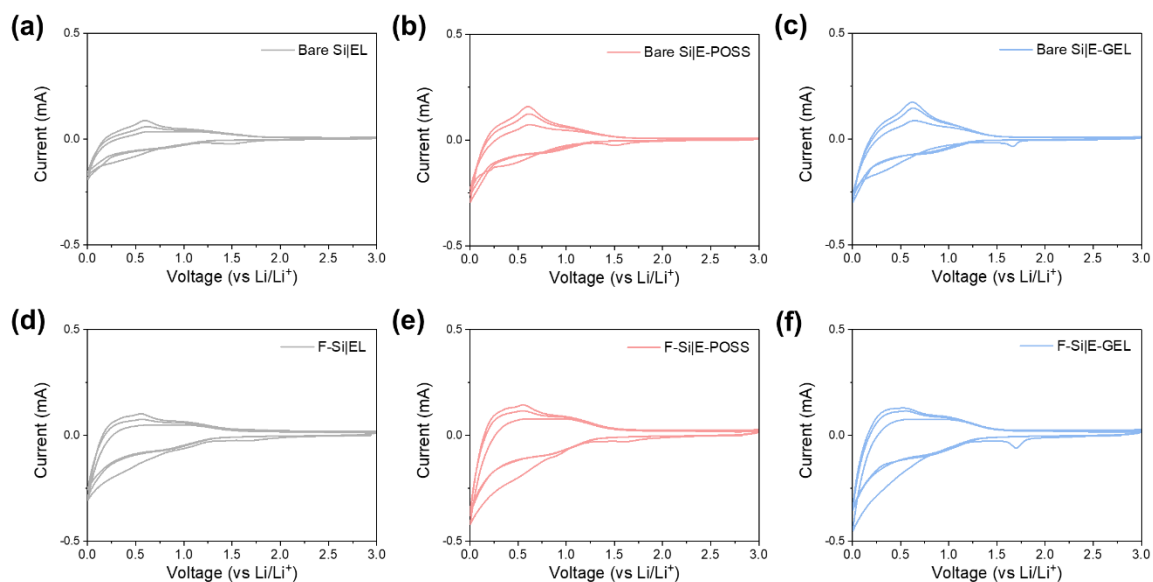

**Figure S18.** Cyclic voltammograms of bare Si and F-Si electrodes depending on electrolytes (EL, E-POSS, E-GEL).

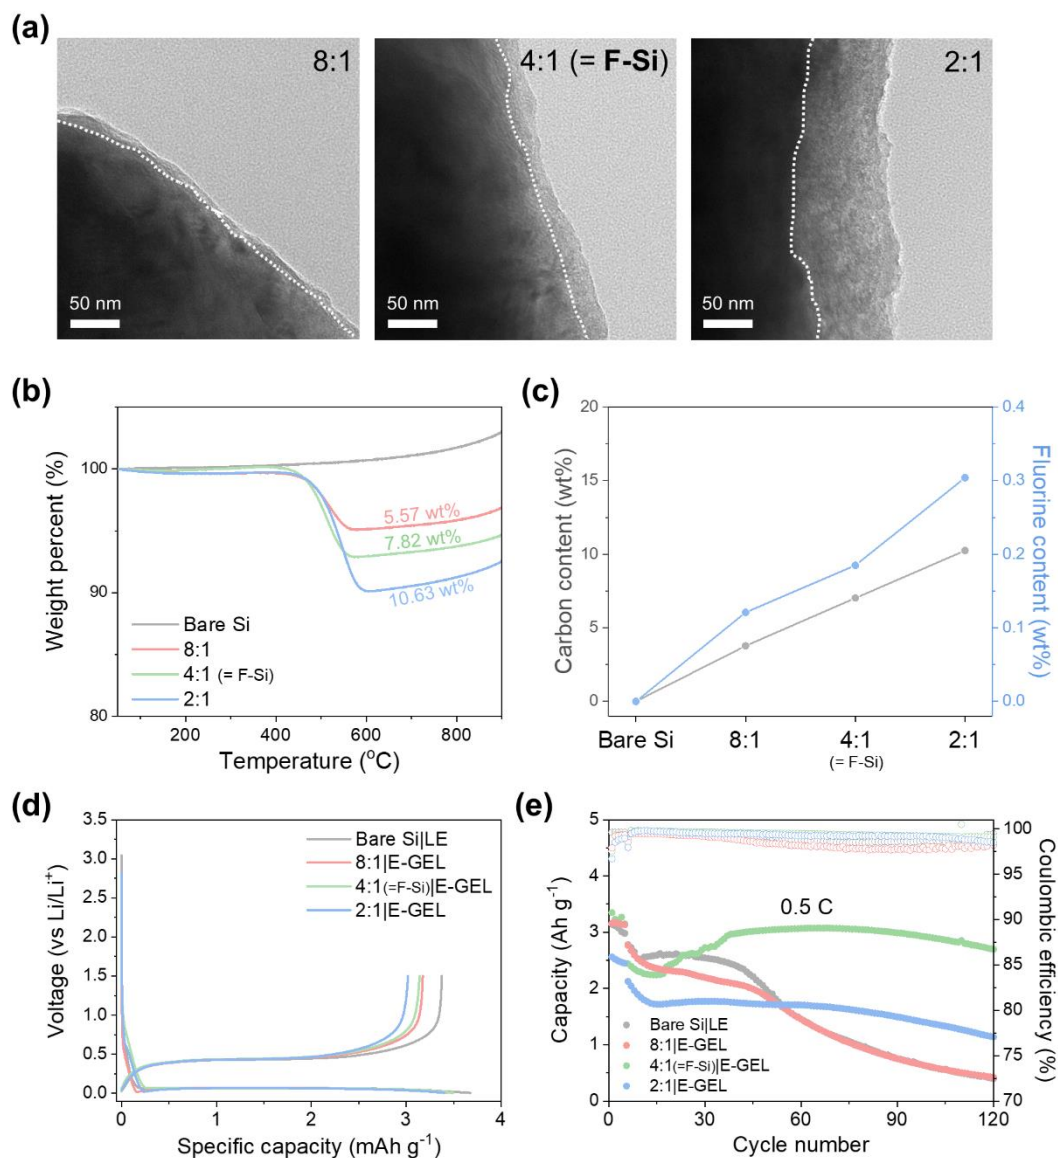

**Figure S19.** (a) Magnified TEM images, (b) TGA, (c) EA, and CIC analysis of fluorinated carbon-incorporated SiMPs with different mass ratio of SiMP to PVDF, and corresponding (d) galvanostatic charge/discharge profiles and (e) cycle stability at 0.5 C.

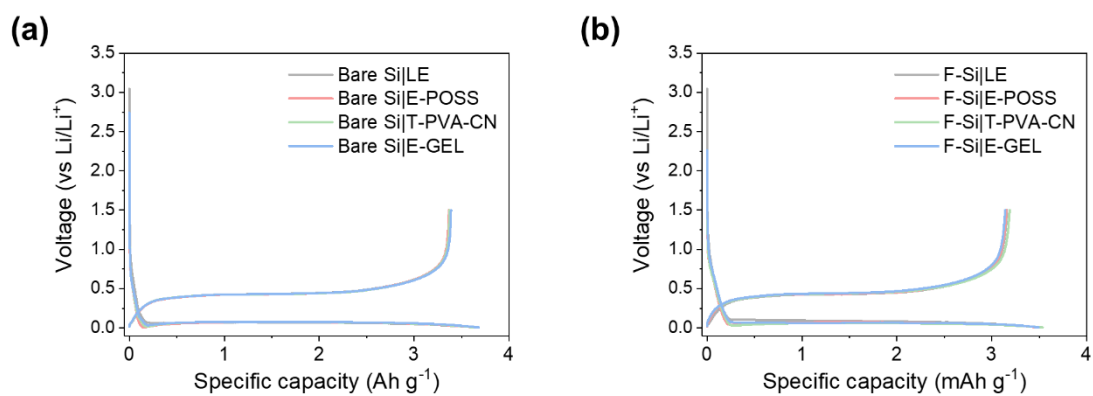

**Figure S20.** Galvanostatic charge/discharge profiles of (a) bare Si and (b) F-Si electrodes with LE, POSS, T-PVA-CN, and E-GEL.

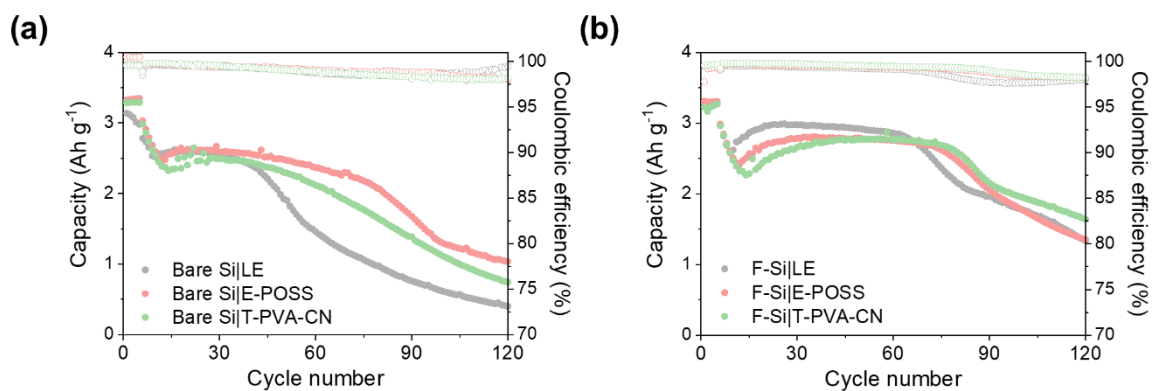

**Figure S21.** Cycle stability of (a) bare Si and (b) F-Si electrodes with LE, E-POSS, T-PVA-CN at 0.5 C.

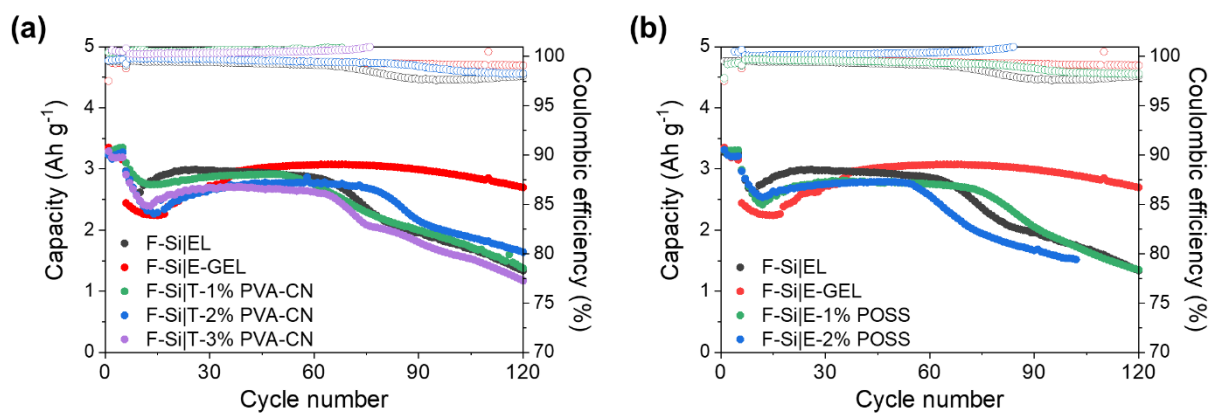

**Figure S22.** Cycle stability of F-Si electrodes with various amounts of (a) PVA-CN and (b) POSS at 0.5 C.

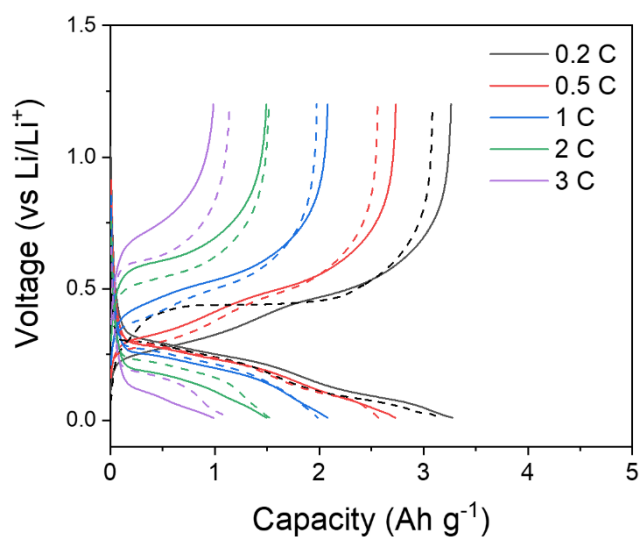

**Figure S23.** Rate capability of bare Si|LE (dashed lines) and F-Si|E-GEL (solid lines) cells at various rates.

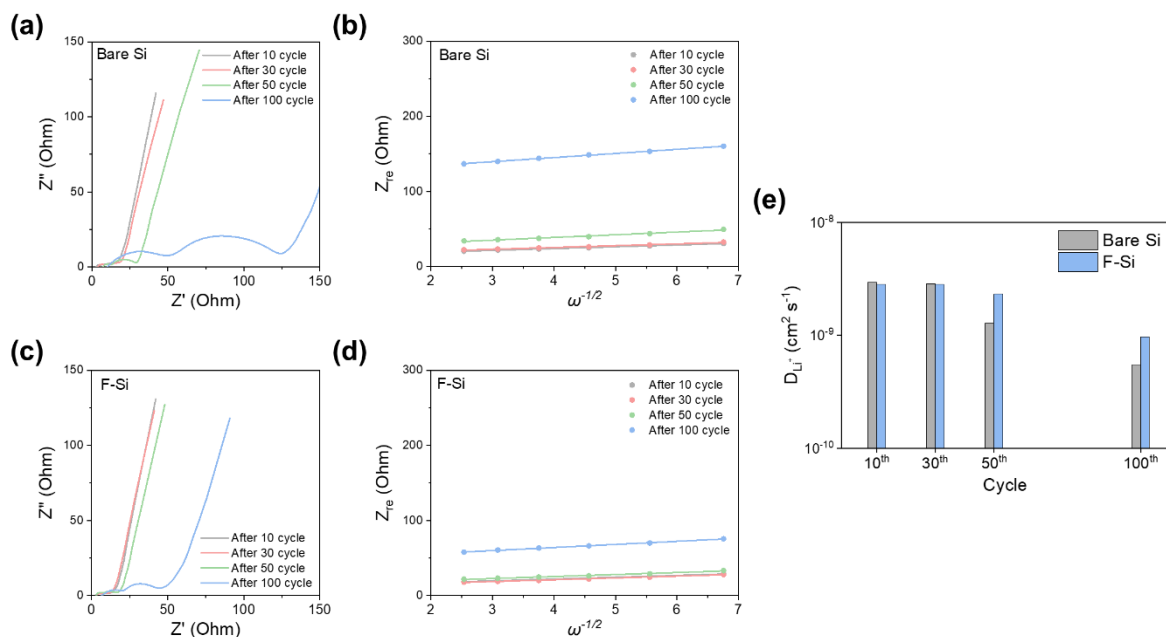

**Figure S24.** Nyquist plots of (a) bare Si and (c) F-Si electrodes after 10, 30, 50, and 100 cycles using LE at 0.5 C and the corresponding linear fitting of (b, d) Warburg impedances and (e) diffusion coefficient of Bare Si and F-Si electrodes.

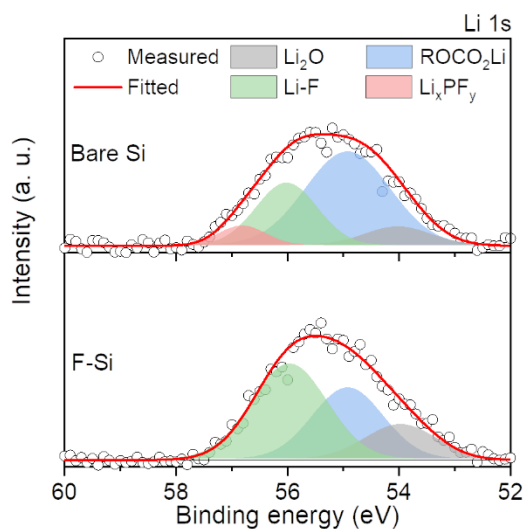

**Figure S25.** Li 1s XPS spectra of bare Si and F-Si electrodes with LE after a galvanostatic charge/discharge cycle.

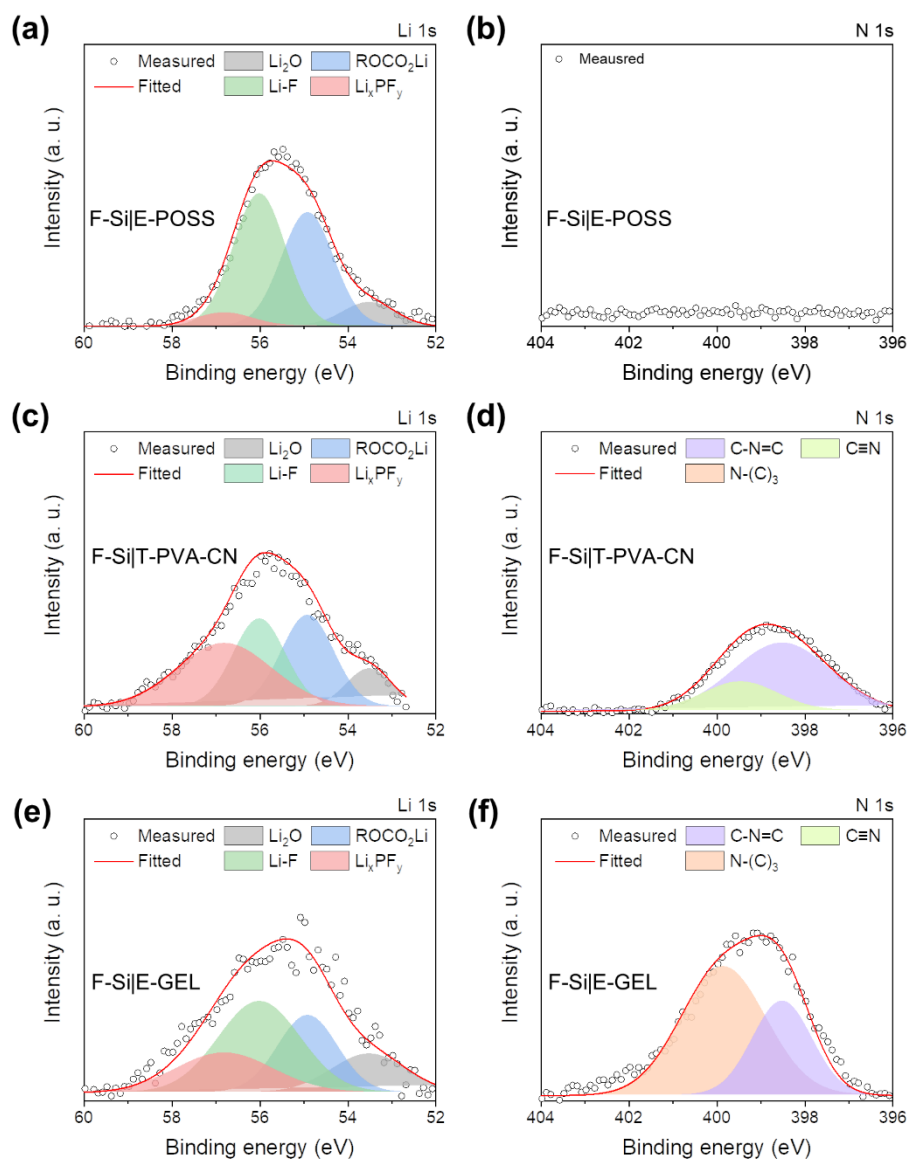

**Figure S26.** Li 1s XPS spectra of F-Si electrodes with (a) E-POSS, (c) T-PVA-CN, and (e) E-GEL after a galvanostatic charge/discharge cycle. N 1s XPS spectra of F-Si electrodes with (b) E-POSS, (d) T-PVA-CN, and (f) E-GEL after a galvanostatic charge/discharge cycle.



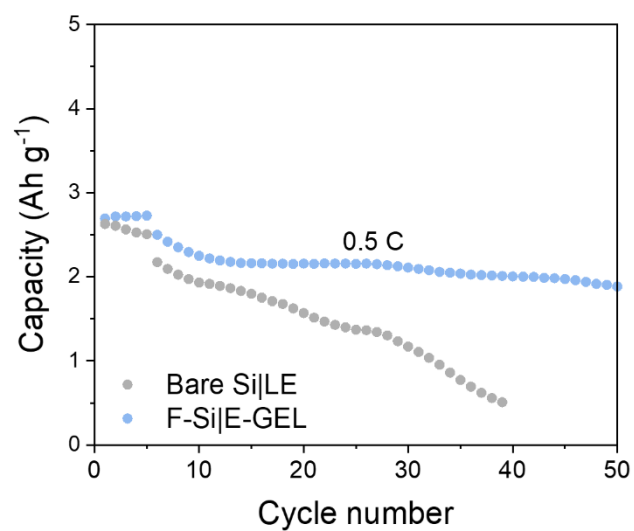

**Figure S27.** Cycle stability of bare Si|LE and F-Si|E-GEL cells with the increased content of the active material to 80 wt% at 0.5 C.

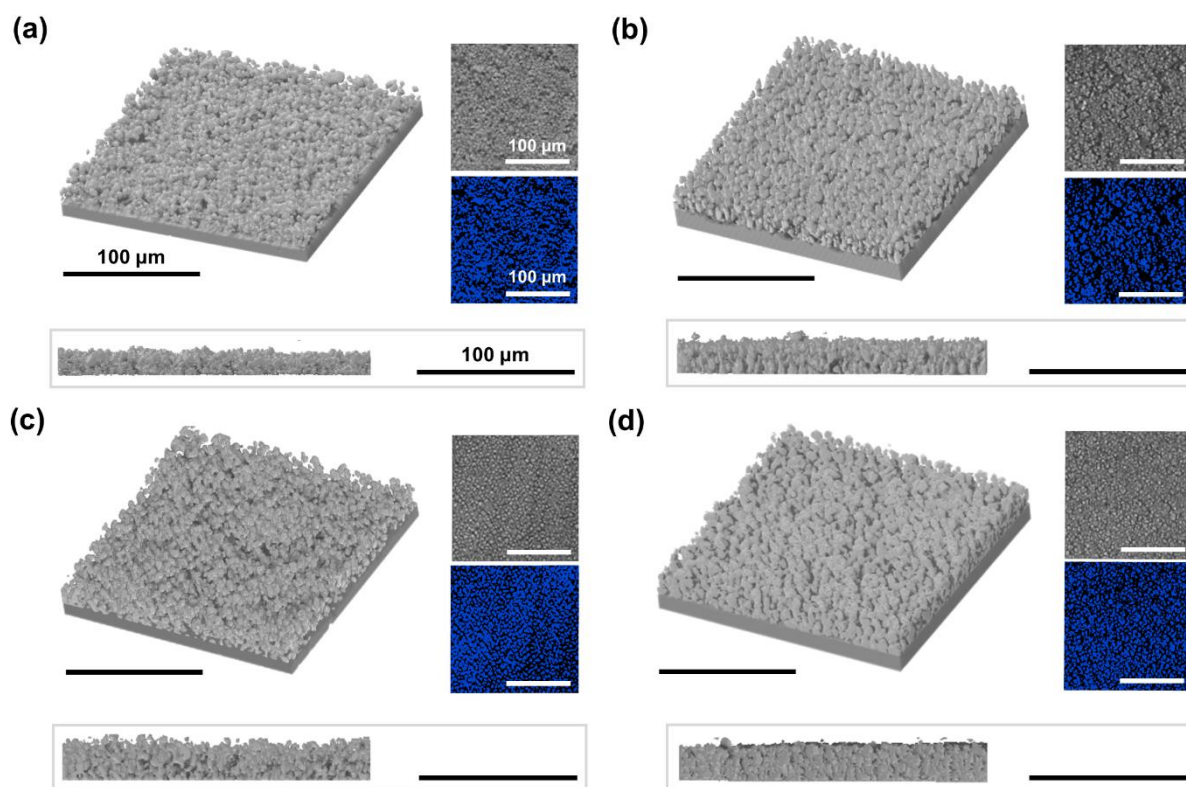

**Figure S28.** The top and cross-sectional X-ray micro-CT images of (a, b) bare Si and (c, d) F-Si electrode, and corresponding Si particle distribution on the electrode surface after 1 (left), 50 cycles (right) at 0.5 C.

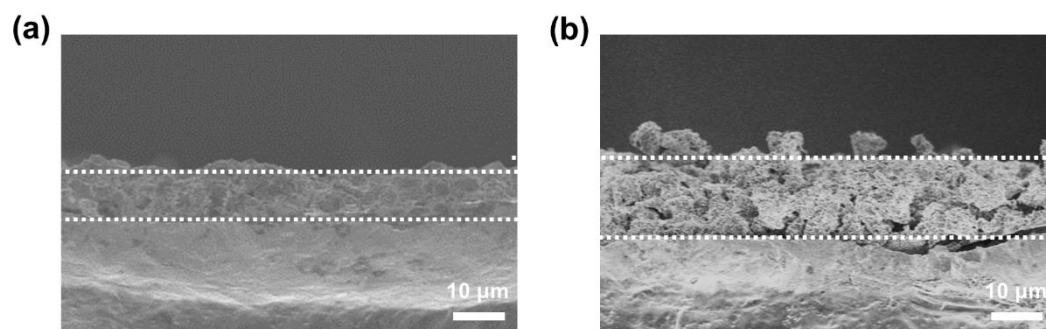

**Figure S29.** Cross-sectional SEM images of pristine (a) bare Si and (b) F-Si electrodes.

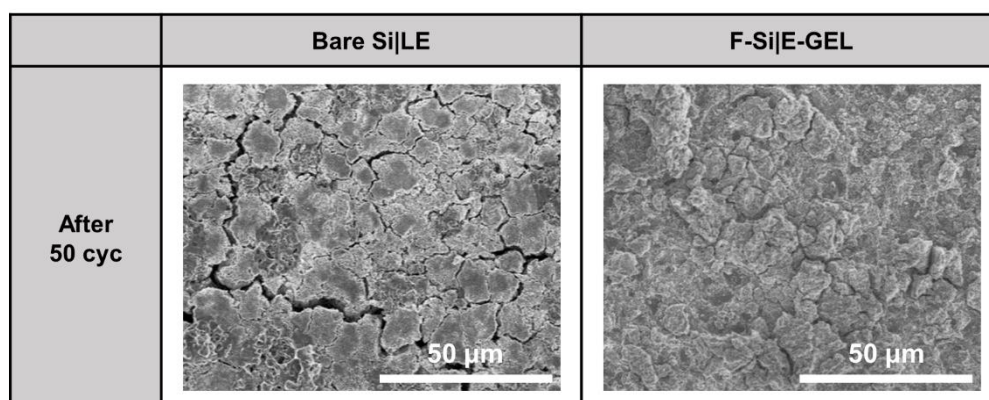

**Figure S30.** Top-view SEM images of bare Si and F-Si electrodes after 50 cycles at 0.5 C with different electrolytes.

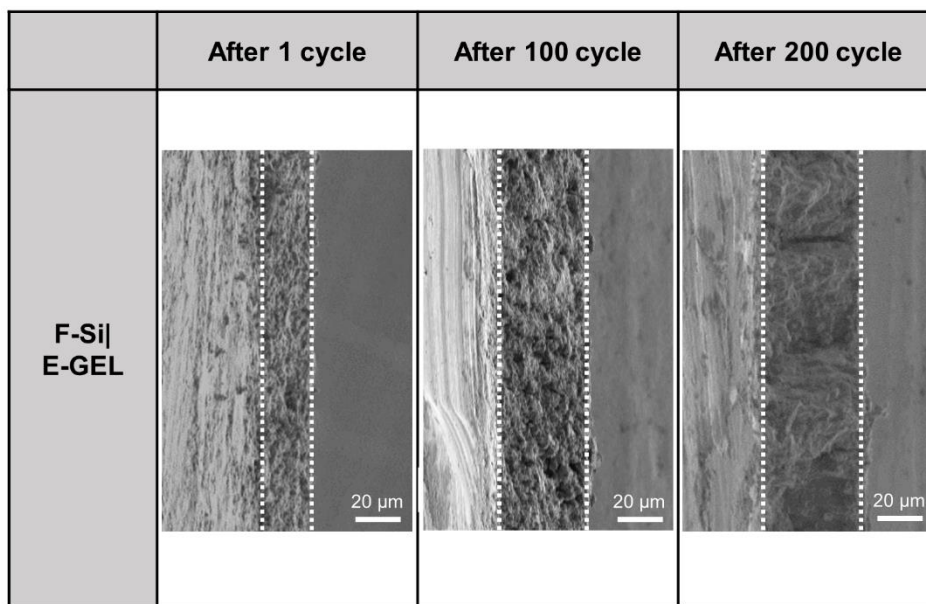

**Figure S31.** Cross-sectional SEM images of F-Si electrodes obtained from F-Si|E-GEL cells: After 1, 100, and 200 cycles at 0.5 C.

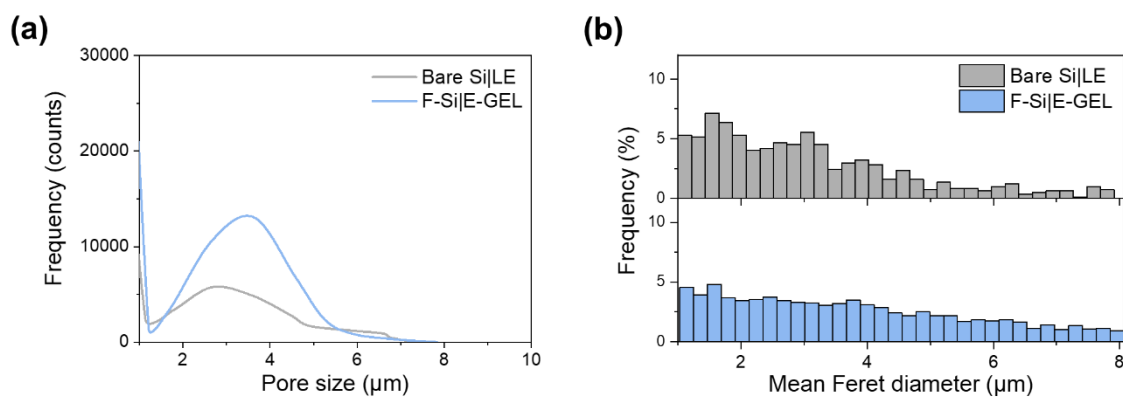

**Figure S32.** Pore size distribution and mean Feret diameter in each electrode after 1 cycle.

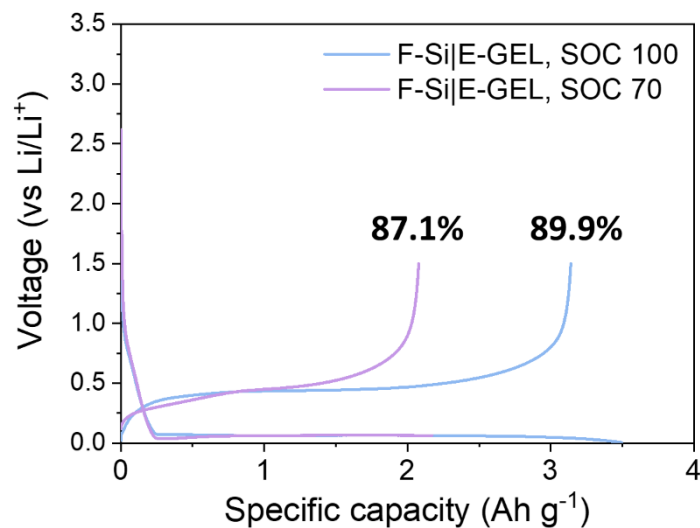

**Figure S33.** Galvanostatic charge/discharge profiles of F-Si electrodes with different state of charge.

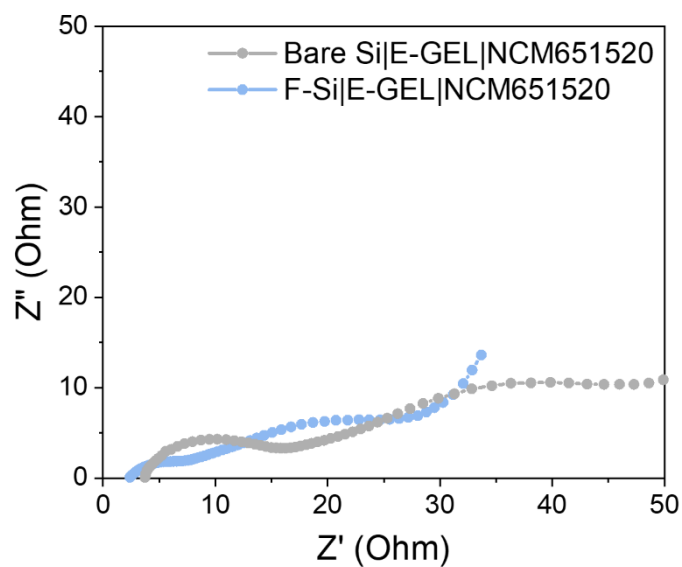

**Figure S34.** Nyquist plots of coin-type full cells after galvanostatic charge/discharge process at 0.1 C.

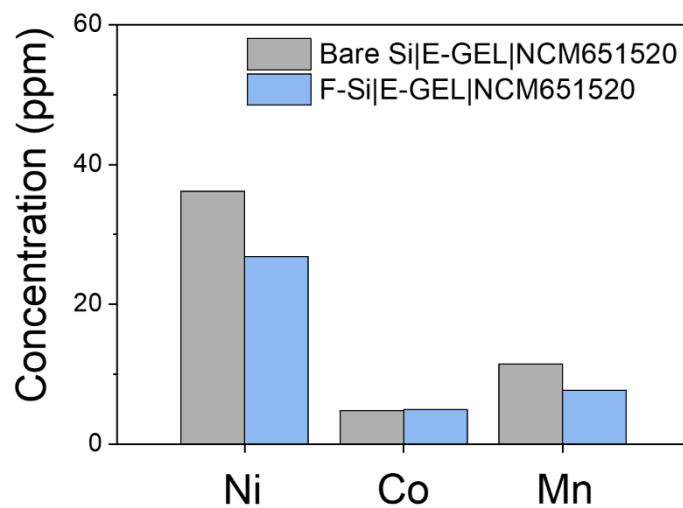

**Figure S35.** ICP-OES analysis of anodes from coin-type full cells after 200 cycles at 0.5C.

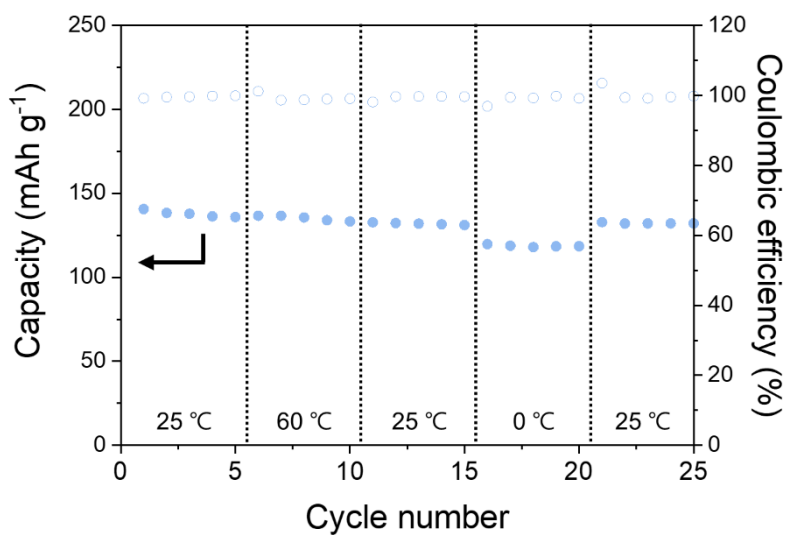

**Figure S36.** Discharge capacities of F-Si|E-GEL|NCM651520 full cell at different temperatures.

**Table S1.** Calculation details for the gravimetric energy density of the F-Si|E-GEL|NCM811 500 mAh-pouch cell.

| Pouch cell capacity (mAh)                          | Average voltage (V) | M <sub>double-sided cathode</sub> (mg) | M <sub>single-sided anode</sub> (mg) | M <sub>double-sided anode</sub> (mg)              |
|----------------------------------------------------|---------------------|----------------------------------------|--------------------------------------|---------------------------------------------------|
| 500                                                | 3.8                 | 741                                    | 554                                  | 634                                               |
| M <sub>total</sub> (kg)                            |                     |                                        |                                      | Gravimetric energy density (Wh kg <sup>-1</sup> ) |
| [(741*3) + (554*2) + (634*2)] / 1000000 = 0.004599 |                     |                                        |                                      | 413.1                                             |

The gravimetric energy density of the 500 mAh-pouch cell was calculated by taking into account the mass of both the cathode and anode, along with their current collectors. The equation was provided below:

$$\text{Gravimetric energy density (Wh kg}^{-1}\text{)} = \frac{\text{Pouch cell capacity} \times \text{Average voltage}}{M_{\text{cathode}} + M_{\text{anode}}}$$

where  $M_{\text{cathode}}$  and  $M_{\text{anode}}$  are the mass of cathode and anode including their current collectors. For more details, the information used to calculate the gravimetric energy density is shown below:

**Table S2.** Calculation details for the volumetric energy density of the F-Si|E-GEL|NCM811 500 mAh-pouch cell.

| Pouch cell capacity (mAh)       | Average voltage (V) | T <sub>double-sided cathode</sub> (μm) | T <sub>single-sided anode</sub> (μm) | T <sub>double-sided anode</sub> (μm)            |
|---------------------------------|---------------------|----------------------------------------|--------------------------------------|-------------------------------------------------|
| 500                             | 3.8                 | 120                                    | 50                                   | 80                                              |
| T <sub>total</sub> (μm)         |                     |                                        | Area (cm <sup>2</sup> )              | Volumetric energy density (Wh L <sup>-1</sup> ) |
| (120*3) + (50*2) + (80*2) = 620 |                     |                                        | 30                                   | 1022                                            |

The volumetric energy density of the 500 mAh-pouch cell was calculated by taking into account the thickness of both the cathode and anode, along with their current collectors.<sup>[2]</sup> The equation was provided below:

$$\text{Volumetric energy density (Wh L}^{-1}\text{)} = \frac{\text{Pouch cell capacity} \times \text{Average voltage}}{(\text{T}_{\text{cathode}} + \text{T}_{\text{anode}}) \times \text{Area}}$$

where T<sub>cathode</sub> and T<sub>anode</sub> are the thickness of cathode and anode including their current collectors. For more details, the information used to calculate the volumetric energy density is shown below:



**Reference**

- [1] W. Shin, IBKS Industry Report: Secondary batteries/electronic component (Overweight),  
[http://hkconsensus.hankyung.com/apps.analysis/analysis.downpdf?report\\_idx=504176](http://hkconsensus.hankyung.com/apps.analysis/analysis.downpdf?report_idx=504176)
- [2] M.-H. Ryou, S.-H. Kim, S.-W. Kim, S.-Y. Lee, *Energy Environ. Sci.* **2022**, 15, 2581.
